# Supplementary material
Source: MDPI journal article supplement (https://www.mdpi.com/2076-3417/9/23/5074)
Supplement: s1 [file s1]

Table S1. PCR primers

| Primer           | Primer Sequence (5'-3')*            | Chromosome Location      | Amplicon Length (bp) |
|------------------|-------------------------------------|--------------------------|----------------------|
| <i>GJB2U_F</i>   | TATTATTAGTATTGATTTTTTTTTTGAAAAATTGG | chr13:20194345-20194494  | 150                  |
| <i>GJB2U_R</i>   | AACAAACACTCCCTCTTAACT               |                          |                      |
| <i>GJB2L_F</i>   | GGGGTTTTGTTTTTTTATGAGTAGATAT        | chr13:20194339-20194514  | 175                  |
| <i>GJB2L_R</i>   | TACCACCATTATTAACATTAACCTTTTCC       |                          |                      |
| <i>HOXA9U_F</i>  | GGGGGGGAAGTATAGTTATTTAA             | chr7:27165541-27165695   | 155                  |
| <i>HOXA9U_R</i>  | ACTTTTACTATAAAAATTATAACTACAAAACATC  |                          |                      |
| <i>HOXA9L_F</i>  | GGTTTTTGTTATAAAAATTATGATTGTAAA      | chr7:27165544-27165692   | 153                  |
| <i>HOXA9L_R</i>  | AAAAAAATACAATCACCTAATAAATTAC        |                          |                      |
| <i>MEOX2U_F</i>  | GGTAGGGTTTTGAAGTTGTTATTTG           | chr7:15687782-15687891   | 110                  |
| <i>MEOX2U_R</i>  | ACATAACTATTCTCCTACTCATTAC           |                          |                      |
| <i>MEOX2L_F</i>  | GGGTTTAGGGTAGAATAGGTGATTATAGAT      | chr7:15687784-1568951    | 168                  |
| <i>MEOX2L_R</i>  | CAAAACTTTAAACTACTACTTACTTAAC        |                          |                      |
| <i>OLIG3U_F</i>  | GTGTGGAGATTTTGGAGAGTTTG             | chr6:137493892-137494036 | 145                  |
| <i>OLIG3U_R</i>  | CAAAACCTACAACAATTAAACTAAAAAT        |                          |                      |
| <i>OLIG3L_F</i>  | ATTTATAGTAGTTGAGGTTGAAGATTA         | chr6:137493785-137493932 | 148                  |
| <i>OLIG3L_R</i>  | AACAAAAATATAACCATCTTAAAAAACTTAC     |                          |                      |
| <i>PON3U_F</i>   | GGAATTTAGGATTTTTGTAAAGGTTAGA        | chr7:95396727-95396826   | 150                  |
| <i>PON3U_R</i>   | AAAACACCAAAATCAAAAAACAAATTCCT       |                          |                      |
| <i>PON3L_F</i>   | AAGAAGGTTAGGAGATAGGTT               | chr7:95396728-95396871   | 144                  |
| <i>PON3L_R</i>   | AAACTCCCAACTTCTACAAAACC             |                          |                      |
| <i>RASSF1L_F</i> | GGATGTGGGGATTTTTTTTTTTTAGTATAGTAAAG | chr3:50341043-50341160   | 118                  |
| <i>RASSF1L_R</i> | CCTCCTCACACCCACC                    |                          |                      |
| <i>TFAP2BU_F</i> | AGGTTTAATAATTTTATTTTAAATTGTTT       | chr6:50817519-50817675   | 157                  |
| <i>TFAP2BU_R</i> | CCATCCCCTCTATTTTCTACT               |                          |                      |
| <i>TFAP2BL_F</i> | TGTTTTTTTATTTTTTTTATAGGGTG          | chr6:50817523-50817665   | 143                  |
| <i>TFAP2BL_R</i> | TTAATAACTTCCACCCCAAATT              |                          |                      |
| <i>Lambda516</i> | AGGAAGAGGATGGTGTAGTAATTAATAAGA      | chrL:2560-2984           | 425                  |
| <i>Lambda517</i> | AACAAACTACATCCACACTTTCACCTC         |                          |                      |

U, Upper or Watson strand; L, Lower or Crick strand; bp, base pairs; \*human sequences based on Genome Reference Consortium Human Build 38 patch release 12
