# Supplementary material
Source: MDPI journal article supplement (https://www.mdpi.com/2076-3417/9/23/5074)
Supplement: s1 [file s1]

>**GJB2**\_U  
TATTATTAGTATTGATTTTTTTTTTGA AAAATTGG**C**GTTT**C**GTGGTTATGGGT**C**GATTTAGGTAGTTTTTGTAGGGA  
**C**GAG**C**GTGAGTTTTGTAT**C**G**C**GGTTATTATTTATTTTTTAGTTTTAGGTTTTAGTTTAAGAGGGAGTGTGT  
>**GJB2**\_L  
GGGGTTTTGTTTTTTTATGAGTAGATATTTTTTTTATAGATTAAGATTTGGAGTTGGAAAGTAGGTGGTAAT**C**G**C**G  
GTATAAAATTACGTT**C**GTTTTGTAGAAATTGTTAGGT**C**GGTTTATGGTTAC**C**GGGG**C**GTTAATTTTTTAAGGA  
AAAGTTAATGTTAATAATGGTGGA  
>**HOXA9**\_U  
GGGGGGGAAGTATAGTTATTTAATAAGTTGT**C**GG**C**GTT**C**G**C**GTTTTATTGGT**C**GTG**C**G**C**GTTAC**C**GTGTT**C**GTTT  
AGTAGAATAATA**C**G**C**GTAATTATTT**C**GTA**C**GTTATTAATGGTT**C**GATGTTTTGTAGTTATAATTTTTATAGTA  
AAAGT  
>**HOXA9**\_L  
GGTTTTGTATATAAAATTATGATTGTAAATAT**C**GGATTATTAATAG**C**GTG**C**GGAGTGATTTAC**C**G**C**GTTATTGT  
TTTGTGGAC**C**GGGTAC**C**GTGAC**C**G**C**GTA**C**GGTTAATGGGGG**C**G**C**GGG**C**G**C**GTAATTTATTAGGTGATTGTATTT  
TTTT  
>**MEOX2**\_U  
GGTAGGGTTTTGAAGTTGTTATTTGTTTG**C**GGG**C**GATAGGGTT**C**GTTGGGGGTAGAGT**C**GTTTATATATAAGTG  
AGTGG**C**GTTGTAATGAGTAGGAGGAATAGTTATGT  
>**MEOX2**\_L  
GGGTTTCGGGTAGAAATAGGTGATTATAGATATTTTTTTGATG**C**GATAGGT**C**GTAGATGGGATATGATTGTTTTT  
TTGTTATTATAG**C**GTTATTTATTTGTGTGTAAAC**C**GATTTGTTTTAG**C**GGATTTTGT**C**GTT**C**GTTAAGTAAGTA  
GTAGTTTTAAAGTTTTG  
>**OLIG3**\_U  
GTGTGGCGATTTTGGAGAGTTTG**C**GTAT**C**GACGGTTTATG**C**G**C**GTAGGGTATGATTT**C**G**C**GTAGTT**C**GTTTATGG  
TTAGGTTTAGGT**C**GTGTATT**C**GTTTG**C**GTT**C**G**C**GTT**C**GTTGATTTTTAGTTTTAATTGTTGTAGGTTTTG  
>**OLIG3**\_L  
ATTTATAGTAGTTGAGGTTGAAGATTAA**C**GGAC**C**GGA**C**GTAAG**C**GGATGTAC**C**GATTTGAATTTAGTTATGGAC  
GGGTTG**C**G**C**GAAAGTTATGTTTTAC**C**G**C**GATAGGGT**C**G**C**GTTG**C**GTAAGTTTTTAAAGATCGTTATATTTTGT  
>**PON3**\_U  
GGAATTTCCGATTTTTGTAAGGTTAGAC**C**GTGAGG**C**GATATTGAATTGTTTT**C**GAGAC**C**G**C**GGGAAGGG**C**GAAAGGT  
AAT**C**GAAAG**C**GAAAGAGTTTTAATTTATTTTTTTTAGGATTTGGGGTA**C**GGGAATTTGTTTTTTGATTTTCGTGTTTT  
>**PON3**\_L  
ACGAAGGTTAGGAGATAGGTTTT**C**GTGTTTTAAATTTTGGAGAAGATGAGTTAAAGTTTTT**C**GTTTT**C**GATTGTTT  
T**C**GTTTTTTT**C**G**C**GTTTT**C**GGGAGTAATTAGTGT**C**GTTTTAC**C**GTTTGGTTTTGTAGAAGTTCGGAGTTT  
>**RASSF1**\_L  
GGATGTGGGGATTTTTTTTTTTTTTAGTATAGTAAAGTTGGTTTTTAGAAATA**C**GGGTATTTT**C**G**C**GTGGTGTTTT**C**  
GGT**C**GT**C**GT**C**GTTGTGGT**C**GTT**C**GGGGTGGGGTGTGAGGAGG  
>**TFAP2B**\_U  
AGGTTTAATAATTTTTATTTTAAATTGTTTTATTTTTTT**C**GGTTTTTTTGGTATTTTTTTTTTGTTTTAGG**C**GTAG  
AGATTTTTTTTTGGG**C**GTTTGTTT**C**GGTTATGAGAAGTTTTT**C**GATTTTGAAAGGGAGTAGAAAAATAGAGGGG  
ATGG  
>**TFAP2B**\_L  
TGTTTTTTATTTTTTTTTTAGGGTG**C**GGAGAGTTTTTTATAGT**C**GGAAATAGAC**C**GTTTAGAAGAGGATTTTTG**C**GTT  
TGGGATAGAAAAGAAATGTTAGGAGGGAT**C**GAGGAGGGATGGGGTAATTTGGGGTGGAAAGTTATTAA  
>**Lambda(L516-L517)**  
AGGAAGAGGATGGTGTAGTAATTAATAAGAAAATATTGGTAGATTACGTT**C**GTGTTTTATT**C**GGAGAGGATGAA  
TGACGCGATAGGAAGAATTTGTCGTTGTT**C**GTGCGGTATTGTATGATTGATGATAGGTAAACGGGTGGTAATA  
GTATAGAAAGACGGACGAAGGGTGGAGTTTACGGTTATTT**C**GTGTTT**C**GATTTGAAAAAATATATTGTAGAGTT  
GGAAGTGTAGATCGGTATGATATAGCGACGTAGGGGATTTGATGATGAAACGTTTATTATTTTT  
ATTTTTTTGGGGTCGGACGGTATGATATCGTTGCGCAATATGTCGGTATTACGGCGGTGGTAGCGGATTTGGA  
GGGTAGTTGCGGTCGTGGAATTTAT**C**GAGTGAAAGTGTGGATGTAGTTTTGT

**Figure S1.** Bisulphite converted amplicon sequences. Methylated cytosines in the context of CpG sites detected in this study are highlighted in bold and underlined. Primer regions are indicated by a dotted underline. U, indicates upper or Watson DNA strand. L, indicates lower or Crick DNA strand.
